# Supplementary material for: Research hotspots and trends in retinopathy of prematurity from 2003 to 2022: a bibliometric analysis
Source: Front Pediatr. 2023 Oct 3;11:1273413. doi: 10.3389/fped.2023.1273413 (PMC10579817; doi:10.3389/fped.2023.1273413)
Supplement: Supplementary file 1 [file Table1.xlsx]

## Sheet: Sheet1
Cluster	LLR Lable	Size	Silhouette	Average Year	Major Citing Article	Most Cited Article
0	genetic polymorphism	71	0.927	2001	Madan, Ashima, and John S Penn. “Animal models of oxygen-induced retinopathy.” Frontiers in bioscience : a journal and virtual library vol. 8 (2003): 1030-43.	Chow, Lily C et al. “Can changes in clinical practice decrease the incidence of severe retinopathy of prematurity in very low birth weight infants?.” Pediatrics vol. 111,2 (2003): 339-45.
1	neurodevelopmental outcome	63	0.912	2015	Tsai, Andrew Sh et al. “Assessment and management of retinopathy of prematurity in the era of anti-vascular endothelial growth factor (VEGF).” Progress in retinal and eye research vol. 88 (2022): 101018.	Hartnett, M Elizabeth, and John S Penn. “Mechanisms and management of retinopathy of prematurity.” The New England journal of medicine vol. 367,26 (2012): 2515-26.
2	threshold retinopathy	53	0.927	2001	Recchia, Franco M, and Antonio Capone Jr. “Contemporary understanding and management of retinopathy of prematurity.” Retina (Philadelphia, Pa.) vol. 24,2 (2004): 283-92.	Hardy, Robert J et al. “Risk analysis of prethreshold retinopathy of prematurity.” Archives of ophthalmology (Chicago, Ill. : 1960) vol. 121,12 (2003): 1697-701.
3	oxygen-induced retinopathy	48	0.862	2008	Hellström, Ann et al. “Retinopathy of prematurity.” Lancet (London, England) vol. 382,9902 (2013): 1445-57.	Mintz-Hittner, Helen A et al. “Efficacy of intravitreal bevacizumab for stage 3+ retinopathy of prematurity.” The New England journal of medicine vol. 364,7 (2011): 603-15.
4	low birth weight infant	42	0.868	2010	Hellström, Ann et al. “Retinopathy of prematurity.” Lancet (London, England) vol. 382,9902 (2013): 1445-57.	Fierson, Walter M et al. “Screening examination of premature infants for retinopathy of prematurity.” Pediatrics vol. 131,1 (2013): 189-95.
5	prematurity diagnosis	42	0.918	2005	Richter, Grace M et al. “Telemedicine for retinopathy of prematurity diagnosis: evaluation and challenges.” Survey of ophthalmology vol. 54,6 (2009): 671-85.	International Committee for the Classification of Retinopathy of Prematurity. “The International Classification of Retinopathy of Prematurity revisited.” Archives of ophthalmology (Chicago, Ill. : 1960) vol. 123,7 (2005): 991-9.
6	artificial intelligence	33	0.927	2016	Tsai, Andrew Sh et al. “Assessment and management of retinopathy of prematurity in the era of anti-vascular endothelial growth factor (VEGF).” Progress in retinal and eye research vol. 88 (2022): 101018.	Fierson, Walter M et al. “Screening Examination of Premature Infants for Retinopathy of Prematurity.” Pediatrics vol. 142,6 (2018): e20183061.
